# Supplementary material for: Increased RNAi Efficacy in Spodoptera exigua via the Formulation of dsRNA With Guanylated Polymers
Source: PubMed Central journal article supplement (PMC5894468; doi:10.3389/fphys.2018.00316), 2018-04-04
Supplement: Image1.pdf [file Image1.pdf]

Supplementary Fig. S1 FTIR spectroscopy

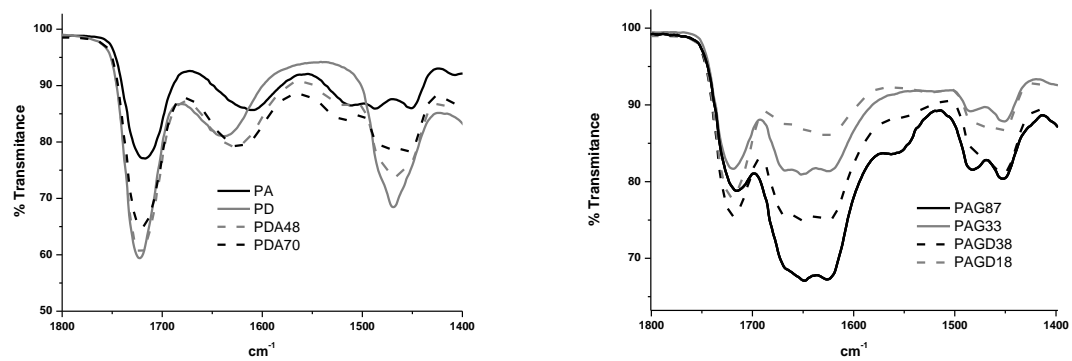

Fig S1. FTIR spectrums of the synthesized (co)polymers Pa, PD, PDA48 and PDA70 (left graph) and the guanylated polymers PAG87, PAG33, PAGD38 and PAGD18 (right graph).
