# Supplementary material for: Increased RNAi Efficacy in Spodoptera exigua via the Formulation of dsRNA With Guanylated Polymers
Source: PubMed Central journal article supplement (PMC5894468; doi:10.3389/fphys.2018.00316), 2018-04-04
Supplement: Image3.pdf [file Image3.pdf]

Supplementary Fig. S3: DLS measurements of the particle size and Z potential of the polyplexes

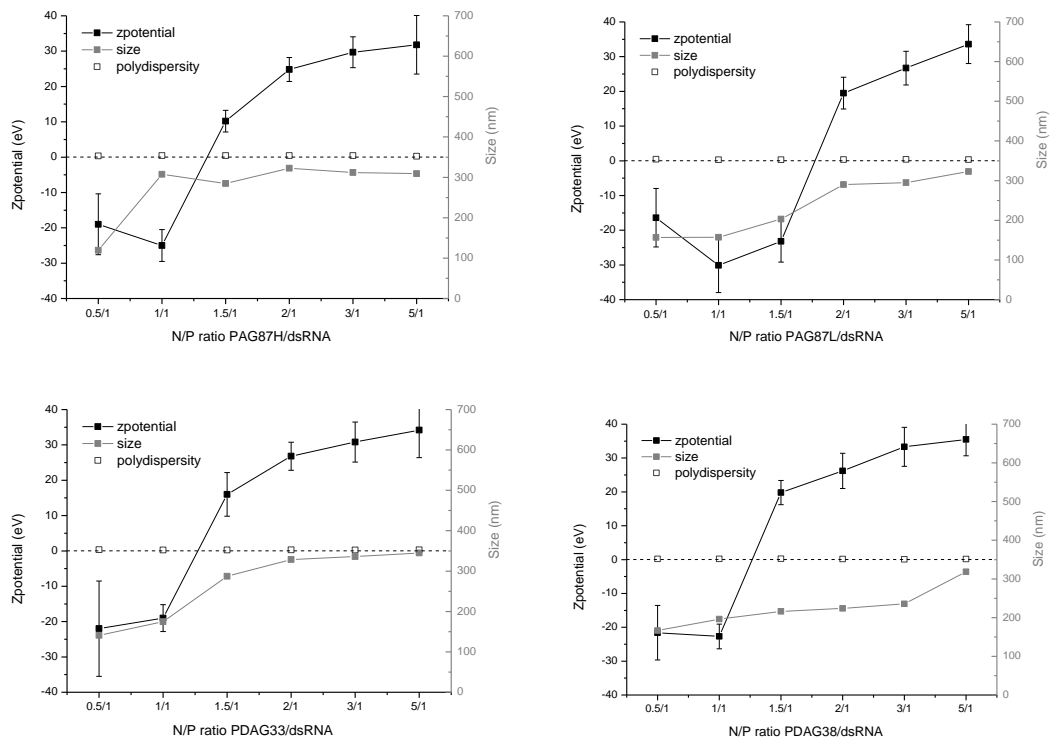

Fig S3. Size and Z potential results for the polyplexes formed with PAG87H, PAG87L, PDAG33 and PDAG38
