# Supplementary material for: Increased RNAi Efficacy in Spodoptera exigua via the Formulation of dsRNA With Guanylated Polymers
Source: PubMed Central journal article supplement (PMC5894468; doi:10.3389/fphys.2018.00316), 2018-04-04
Supplement: Table1.pdf [file Table1.pdf]

Supplementary Table S1: Overview of all primers used in this study, including primers used for dsRNA synthesis (red=T7 promotor sequence) and primers used for RT-qPCR, for which PCR efficiency and R<sup>2</sup> values are given.

| Primer name <sup>1</sup> | Primer sequence                               | Amplicon size |                |               |
|--------------------------|-----------------------------------------------|---------------|----------------|---------------|
| dsGFP_Fw                 | TAATACGACTCACTATAGGGTACGGCGTGCAGTGCT          | 495           |                |               |
| dsGFP_Rev                | TAATACGACTCACTATAGGGTGATCGCGTTCTCG            | 403           |                |               |
| dsChSB_Fw                | TAATACGACTCACTATAGGGAGAGCGTTTCGATGAGGATCAG    | 403           |                |               |
| dsChSB_Rev               | TAATACGACTCACTATAGGGAGACTGAGATCGGCAAGTCCATTAG |               |                |               |
| Primer name <sup>1</sup> | Primer sequence                               | Efficiency    | R <sup>2</sup> | Amplicon size |
| qPCR ChSB_Fw             | GGCATTGCGTACTGGTCTT                           | 92.00%        | 0.993          | 216           |
| qPCR ChSB_Rev            | CACTGTTGCCGTTTAGCAGA                          |               |                |               |
| qPCR Actin_Fw            | TGCGTGACATCAAGGAGAAG                          | 90.30%        | 0.997          | 174           |
| qPCR Actin_Rev           | AGAAGGAAGGCTGGAAGAGG                          |               |                |               |
| qPCR GAPDH_Fw            | GACAACCACTCATCTATCTTCG                        | 96.10%        | 0.996          | 173           |
| qPCR GAPDH_Rev           | AACATTTATCTCTACAACGCAATC                      |               |                |               |
| qPCR PGCP_Fw             | AGGAGAAGGTGCAATGGATG                          | 94.40%        | 0.992          | 180           |
| qPCR PGCP_Rev            | TTGTCGAGCTCGTTTTGTG                           |               |                |               |

<sup>1</sup>Fw refers to forward primer, Rev refers to reversed primer.
