# Supplementary material for: Increased RNAi Efficacy in Spodoptera exigua via the Formulation of dsRNA With Guanylated Polymers
Source: PubMed Central journal article supplement (PMC5894468; doi:10.3389/fphys.2018.00316), 2018-04-04
Supplement: Table2.pdf [file Table2.pdf]

Supplementary Table S2. Polymer synthesis: Feed molar fraction ( $F_n$ ), monomer ([M]) and initiator ([APS]) molar concentration used for the synthesis of the different (co)polymers. Polymer guanylation: reaction equivalents of AEMA, HPC and TEA used for the synthesis of the corresponding guanylated polymers.

| Polymer      | Feed molar fraction |            | [M] | [APS] | Guanylated polymer | Reaction equivalents |     |     |
|--------------|---------------------|------------|-----|-------|--------------------|----------------------|-----|-----|
|              | $F_{DMAEMA}$        | $F_{AEMA}$ |     |       |                    | AEMA                 | HPC | TEA |
| <b>PAH</b>   | -                   | 1          | 1   | 0.87  | <b>PAG 87H</b>     | 1                    | 1.5 | 1.5 |
|              | -                   | 1          | 1   | 0.87  | <b>PAG33</b>       | 1                    | 0.5 | 0.5 |
| <b>PAL</b>   | -                   | 1          | 0.5 | 0.87  | <b>PAG 87L</b>     | 1                    | 1.5 | 1.5 |
| <b>PD</b>    | 1                   | -          | 1   | 0.87  |                    |                      |     |     |
| <b>PDA48</b> | 0.50                | 0.50       | 1   | 0.87  | <b>PDAG18</b>      | 1                    | 1   | 1   |
| <b>PDA70</b> | 0.25                | 0.75       | 1   | 0.87  | <b>PDAG38</b>      | 1                    | 1   | 1   |
