# Supplementary material for: Increased RNAi Efficacy in Spodoptera exigua via the Formulation of dsRNA With Guanylated Polymers
Source: PubMed Central journal article supplement (PMC5894468; doi:10.3389/fphys.2018.00316), 2018-04-04
Supplement: Table3.pdf [file Table3.pdf]

Supplementary Table S3. Detailed statistical data for the mortality, weight and qPCR data of the *in vivo* RNAi feeding bioassay

**Mortality data**

| (I) Treatment   | (J) Treatment   | Sig.  |
|-----------------|-----------------|-------|
| Polyplex SeChsB | nAKED SEChsB    | .063  |
|                 | Polymer         | .033  |
|                 | GFP             | .033  |
|                 | Water           | .033  |
| nAKED SEChsB    | Polyplex SeChsB | .063  |
|                 | Polymer         | .359  |
|                 | GFP             | .359  |
|                 | Water           | .359  |
| Polymer         | Polyplex SeChsB | .033  |
|                 | nAKED SEChsB    | .359  |
|                 | GFP             | 1.000 |
|                 | Water           | 1.000 |
| GFP             | Polyplex SeChsB | .033  |
|                 | nAKED SEChsB    | .359  |
|                 | Polymer         | 1.000 |
|                 | Water           | 1.000 |
| Water           | Polyplex SeChsB | .033  |
|                 | nAKED SEChsB    | .359  |
|                 | Polymer         | 1.000 |
|                 | GFP             | 1.000 |

**Weight data**

| (I) Treatment   | (J) Treatment   | Sig. |
|-----------------|-----------------|------|
| Polyplex SeCHSB | Naked SeCHSB    | .034 |
|                 | Polymer         | .002 |
|                 | dsGFP           | .000 |
|                 | Water           | .001 |
| Naked SeCHSB    | Polyplex SeCHSB | .034 |
|                 | Polymer         | .442 |
|                 | dsGFP           | .008 |
|                 | Water           | .155 |
| Polymer         | Polyplex SeCHSB | .002 |
|                 | Naked SeCHSB    | .442 |
|                 | dsGFP           | .127 |
|                 | Water           | .929 |
| dsGFP           | Polyplex SeCHSB | .000 |
|                 | Naked SeCHSB    | .008 |
|                 | Polymer         | .127 |
|                 | Water           | .377 |
| Water           | Polyplex SeCHSB | .001 |
|                 | Naked SeCHSB    | .155 |
|                 | Polymer         | .929 |
|                 | dsGFP           | .377 |

#### qPCR data

| (I) Treatment | (J) Treatment | Sig. |
|---------------|---------------|------|
| Control       | Naked         | .000 |

|                   |                   |      |
|-------------------|-------------------|------|
|                   | Polyplex G23+ChsB | .000 |
| Naked             | Control           | .000 |
|                   | Polyplex G23+ChsB | .039 |
| Polyplex G23+ChsB | Control           | .000 |
|                   | Naked             | .039 |
